# Supplementary material for: Advanced Maternal Age Differentially Affects Embryonic Tissues with the Most Severe Impact on the Developing Brain
Source: MDPI journal article supplement (doi:10.3390/cells12010076), 2022-12-24
Supplement: s1 [file s1]

## Supplementary Materials

### Advanced maternal age differentially affects embryonic tissues with the most severe impact on the developing brain

Caroline Kokorudz<sup>1</sup>, Bethany N. Radford<sup>1</sup>, Wendy Dean<sup>2,3\*</sup> and Myriam Hemberger<sup>1,3\*</sup>

## Figure S1

| A Young   |            |                     |                         | B Aged      |            |                     |                         |
|-----------|------------|---------------------|-------------------------|-------------|------------|---------------------|-------------------------|
| Sample    | # of reads | # of mappable reads | # mappable reads/tissue | Sample      | # of reads | # of mappable reads | # mappable reads/tissue |
| B5-1 L001 | 18115368   | 16405809 (90.56%)   | 16736193                | B_A1-1 L001 | 25085236   | 22426812 (89.40%)   | 18930423                |
| B5-1 L002 | 18202445   | 16489012 (90.59%)   |                         | B_A1-1 L002 | 24665766   | 22034455 (89.33%)   |                         |
| B6-2 L001 | 15498559   | 13939001 (89.94%)   |                         | B_A1-4 L001 | 24658959   | 21793710 (88.38%)   |                         |
| B6-2 L002 | 15607380   | 14046066 (90.00%)   |                         | B_A1-4 L002 | 24310882   | 21473392 (88.33%)   |                         |
| B7-5 L001 | 21867857   | 19699874 (90.09%)   |                         | B_A2-1 L001 | 22118628   | 19428881 (87.84%)   |                         |
| B7-5 L002 | 22010132   | 19837401 (90.13%)   | 17991353                | B_A2-1 L002 | 21659873   | 19013685 (87.78%)   | 16731799                |
| F5-1 L001 | 18269895   | 16462042 (90.10%)   |                         | B_A2-2 L001 | 18342874   | 15939254 (86.90%)   |                         |
| F5-1 L002 | 18355323   | 16545200 (90.14%)   |                         | B_A2-2 L002 | 18034015   | 15658297 (86.83%)   |                         |
| F6-2 L001 | 19816443   | 17705112 (89.35%)   |                         | B_A3-1 L001 | 23250012   | 20152905 (86.68%)   |                         |
| F6-2 L002 | 19916812   | 17801554 (89.38%)   |                         | B_A3-1 L002 | 22927608   | 19861151 (86.63%)   |                         |
| F7-5 L001 | 21843315   | 19663937 (90.02%)   | 16809203                | B_A3-2 L001 | 18375294   | 14848125 (80.80%)   | 16545717                |
| F7-5 L002 | 21947617   | 19770277 (90.08%)   |                         | B_A3-2 L002 | 17990672   | 14534403 (80.79%)   |                         |
| H5-1 L001 | 21937313   | 20033574 (91.32%)   |                         | F_A1-1 L001 | 19561818   | 17426617 (89.08%)   |                         |
| H5-1 L002 | 22065962   | 20160279 (91.36%)   |                         | F_A1-1 L002 | 19096899   | 17001401 (89.03%)   |                         |
| H6-2 L001 | 14553119   | 13009485 (89.39%)   |                         | F_A1-4 L001 | 21502939   | 19039307 (88.54%)   |                         |
| H6-2 L002 | 14627585   | 13085492 (89.46%)   | 17234359                | F_A1-4 L002 | 21100549   | 18670659 (88.48%)   | 18973167                |
| H7-5 L001 | 19003397   | 17203426 (90.53%)   |                         | F_A2-1 L001 | 19251902   | 16925613 (87.92%)   |                         |
| H7-5 L002 | 19164522   | 17362964 (90.60%)   |                         | F_A2-1 L002 | 18931199   | 16636105 (87.88%)   |                         |
| P5-1 L001 | 21667487   | 19390523 (89.49%)   |                         | F_A2-2 L001 | 19570215   | 17287715 (88.34%)   |                         |
| P5-1 L002 | 21812585   | 19535173 (89.56%)   |                         | F_A2-2 L002 | 19243009   | 16988142 (88.28%)   |                         |
| P6-2 L001 | 17140098   | 15062724 (87.88%)   | 16545717                | F_A3-1 L001 | 17463910   | 15162001 (86.82%)   | 16545717                |
| P6-2 L002 | 17220401   | 15145847 (87.95%)   |                         | F_A3-1 L002 | 17109047   | 14841656 (86.75%)   |                         |
| P7-5 L001 | 19003152   | 17072871 (89.84%)   |                         | F_A3-2 L001 | 17954439   | 15571576 (86.73%)   |                         |
| P7-5 L002 | 19134723   | 17199016 (89.88%)   |                         | F_A3-2 L002 | 17572531   | 15230797 (86.67%)   |                         |
|           |            |                     |                         | H_A1-1 L001 | 20640736   | 17832644 (86.40%)   |                         |
|           |            |                     |                         | H_A1-1 L002 | 20312012   | 17537905 (86.34%)   | 18973167                |
|           |            |                     |                         | H_A1-4 L001 | 22410551   | 19911031 (88.85%)   |                         |
|           |            |                     |                         | H_A1-4 L002 | 21981520   | 19514867 (88.78%)   |                         |
|           |            |                     |                         | H_A2-1 L001 | 17963091   | 15958566 (88.84%)   |                         |
|           |            |                     |                         | H_A2-1 L002 | 17571961   | 15596072 (88.76%)   |                         |
|           |            |                     |                         | H_A2-2 L001 | 17311214   | 15575568 (89.97%)   | 18973167                |
|           |            |                     |                         | H_A2-2 L002 | 16758893   | 15063762 (89.89%)   |                         |
|           |            |                     |                         | H_A3-1 L001 | 17565877   | 15389820 (87.61%)   |                         |
|           |            |                     |                         | H_A3-1 L002 | 17173086   | 15037790 (87.57%)   |                         |
|           |            |                     |                         | H_A3-2 L001 | 18065976   | 15871622 (87.85%)   |                         |
|           |            |                     |                         | H_A3-2 L002 | 17655000   | 15498961 (87.79%)   | 18973167                |
|           |            |                     |                         | P_A1-1 L001 | 21530883   | 18858378 (87.59%)   |                         |
|           |            |                     |                         | P_A1-1 L002 | 21057867   | 18429102 (87.52%)   |                         |
|           |            |                     |                         | P_A1-4 L001 | 23323075   | 20084292 (86.11%)   |                         |
|           |            |                     |                         | P_A1-4 L002 | 22873048   | 19678823 (86.03%)   |                         |
|           |            |                     |                         | P_A2-1 L001 | 16119215   | 14339185 (88.96%)   | 18973167                |
|           |            |                     |                         | P_A2-1 L002 | 15796336   | 14038858 (88.87%)   |                         |
|           |            |                     |                         | P_A2-2 L001 | 18205932   | 16068119 (88.26%)   |                         |
|           |            |                     |                         | P_A2-2 L002 | 17817190   | 15712057 (88.18%)   |                         |
|           |            |                     |                         | P_A3-1 L001 | 18314309   | 14548534 (79.44%)   |                         |
|           |            |                     |                         | P_A3-1 L002 | 17888546   | 14193807 (79.35%)   | 18973167                |
|           |            |                     |                         | P_A3-2 L001 | 34604859   | 31198764 (90.16%)   |                         |
|           |            |                     |                         | P_A3-2 L002 | 33879666   | 30528083 (90.11%)   |                         |

**Figure S1. RNA-seq metrics.**

(A) Number of mappable reads per tissue for all young tissues samples RNA-sequenced. B, F, H, and P stand for brain, face, face, and placenta, respectively. L001 and L002 correspond to lanes 1 and 2, respectively. The percentage of mappable reads per sample is bolded. (B) Number of mappable reads per tissue for all aged tissues samples RNA-sequenced. B, F, H, and P stand for brain, face, face, and placenta, respectively. L001 and L002 correspond to lanes 1 and 2, respectively. The percentage of mappable reads per sample is bolded.

**Figure S2**

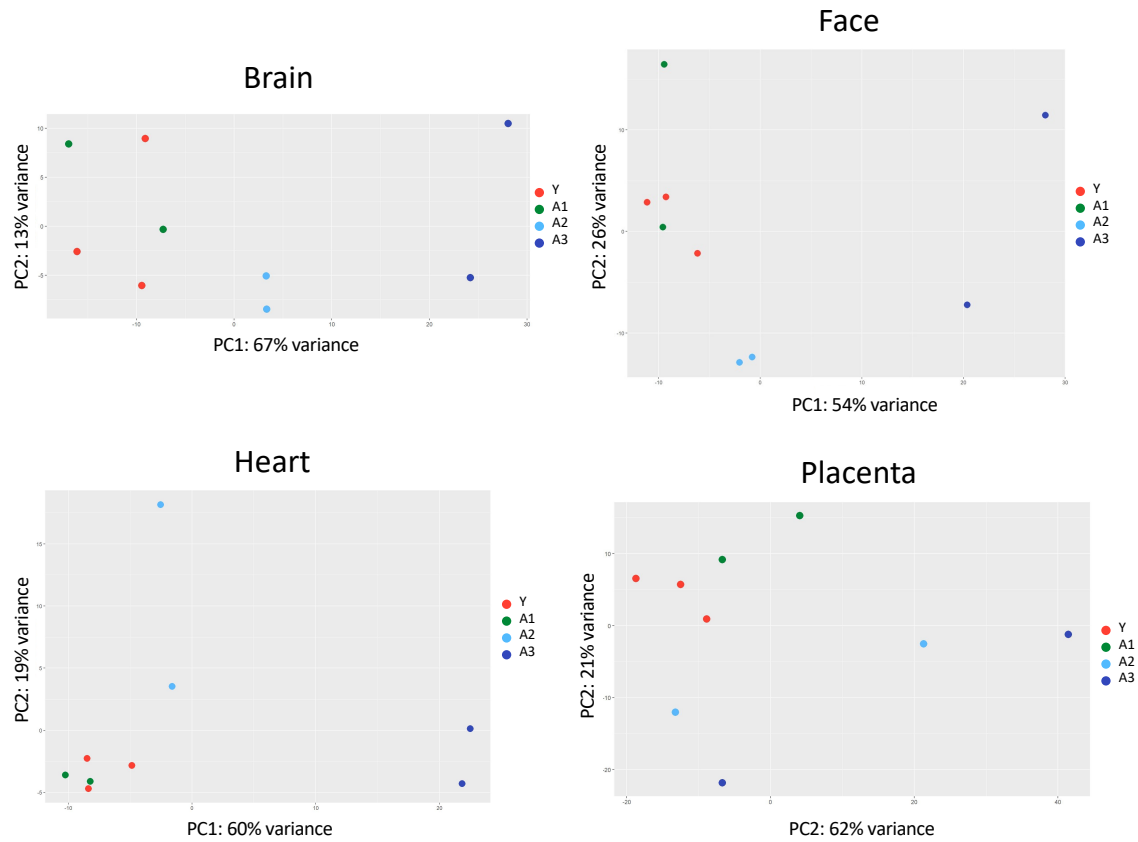

**Figure S2. Increased transcriptional variability as a functions of AMA by tissue type.**

PCA plots of RNA-seq data clustering samples by tissue type. Top left to bottom right: brain, face, heart, and placental PCA plots. Red, green, light blue, and dark blue dots correspond to tissue samples from young litters, aged litter 1, aged litter 2, aged litter 3, respectively.

**Figure S3**

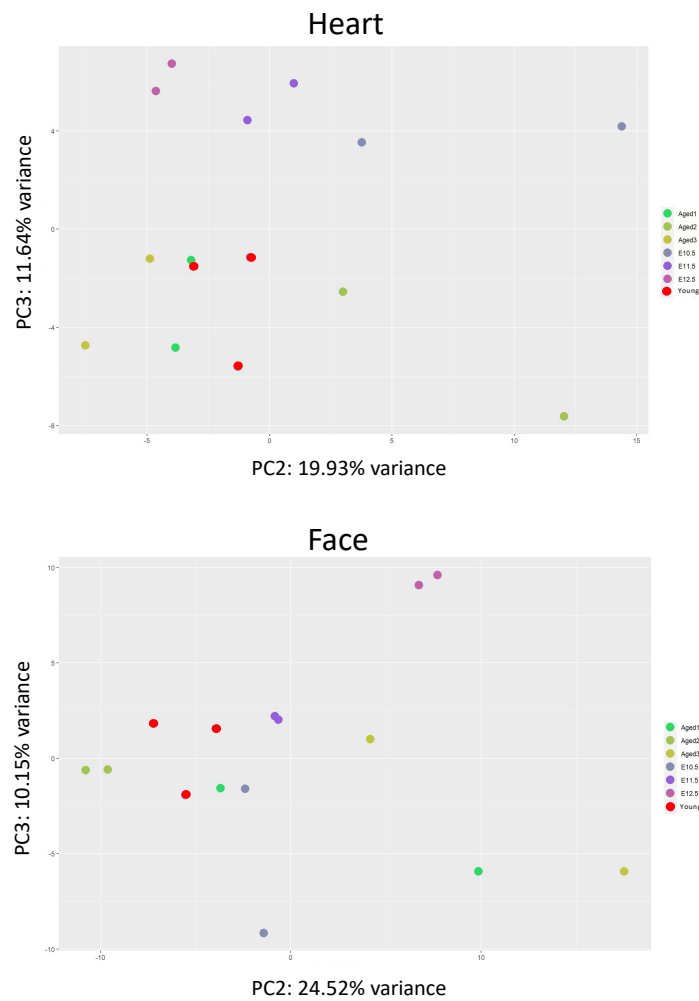

**Figure S3. Developmental time course integration of heart and brain samples.**

PCAs plot of embryonic heart (top) and brain (bottom) data from the young and aged cohorts, mapped onto a developmental time course of these tissues from E10.5, E11.5, and E12.5. Samples from aged litter 1, 2, and 3 are bright green, green, and yellow, respectively. Samples from the young cohort are red.

Figure S4

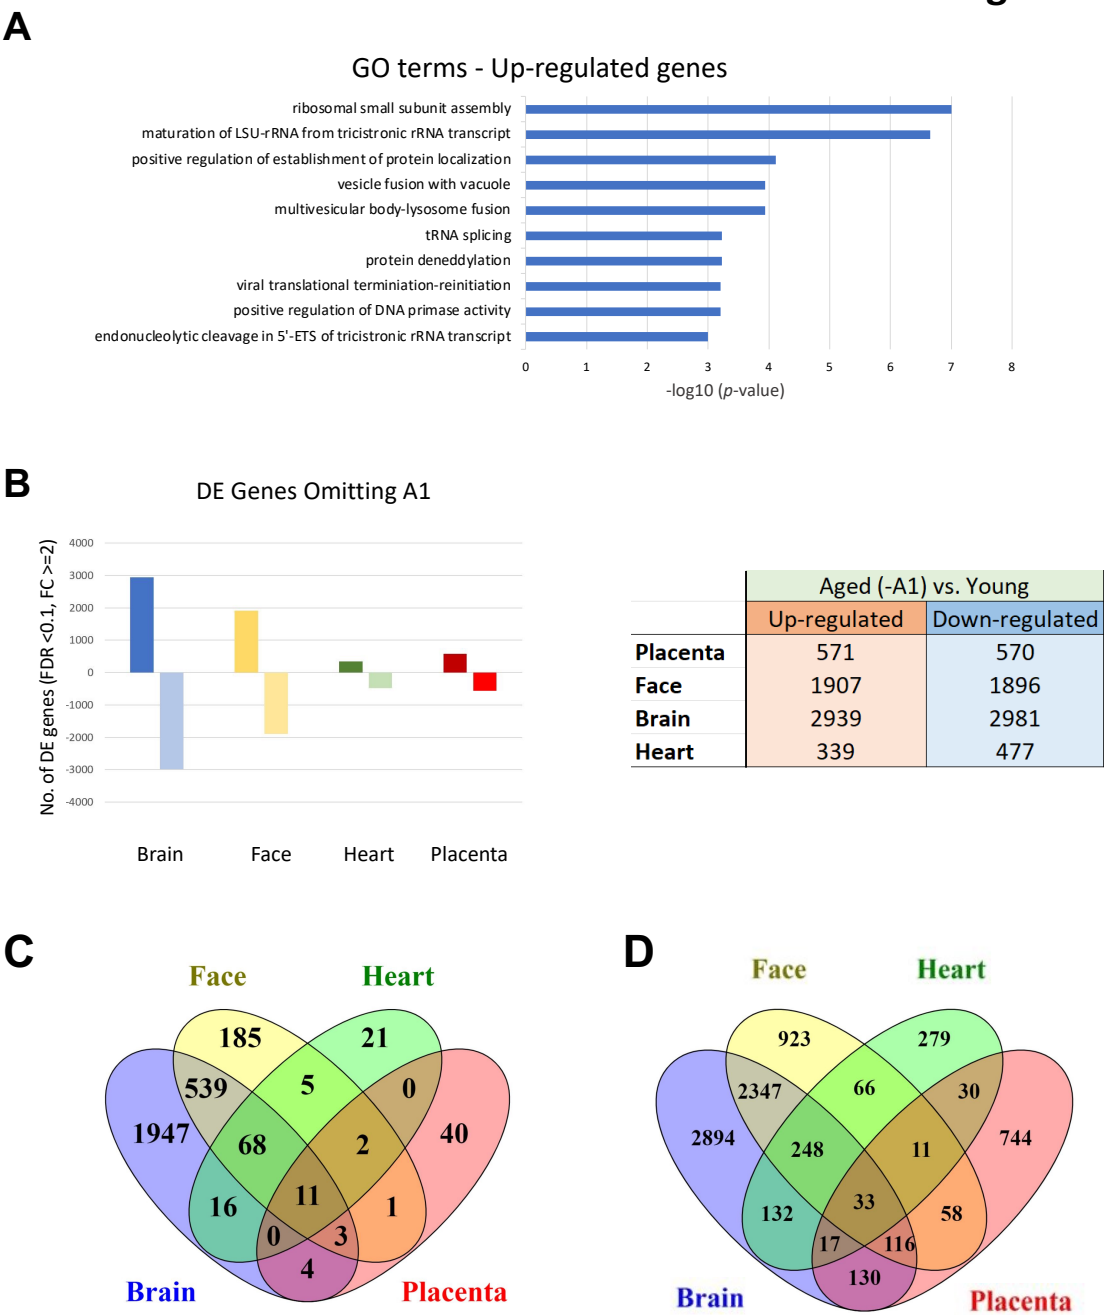

**Figure S4. Differential gene expression analysis.**

(A) Gene ontology (GO) terms associated with the top up-regulated genes in aged brain samples using Panther GO analysis. (B) Number of differentially expressed genes per tissue comparing young vs. aged samples when aged litter 1 is omitted shown in a bar graph (left) and in a table (right). Left: Bars above and below zero indicate up- and down-regulated genes, respectively. (C) Number of overlapping up- or down-regulated genes between the face, heart, brain, and placenta. (D) Number of overlapping up- or down-regulated genes between the face, heart, brain, and placenta when aged litter 1 is omitted.

**Figure S5**

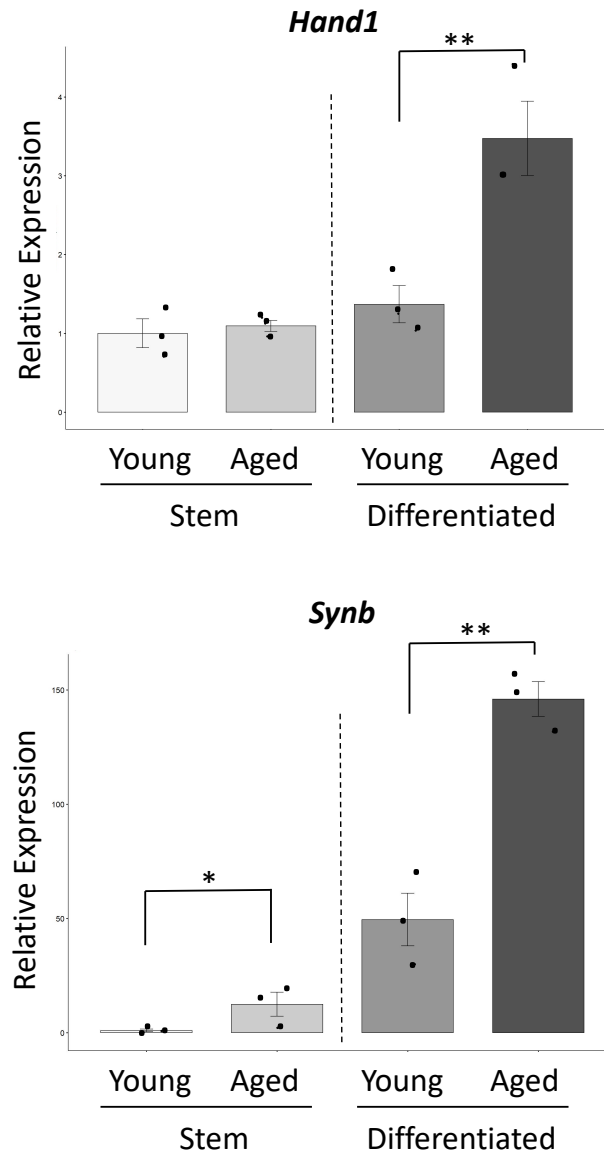

**Figure S5. Impact on trophoblast cell types-specific gene expression as a consequence of uterine stromal cell conditioned medium from young and aged females.**

RT-qPCR data of trophoblast cell-type specific marker genes on exposure to young vs. aged decidualizing uterine stromal-cell conditioned medium. Cells were assessed in stem cell conditions and after three days of differentiation. *Hand1* is a giant cell marker, while *Synb* is a syncytiotrophoblast marker. Data are normalized to the stem cell conditions exposed to young conditioned media and plotted as mean  $\pm$  SEM. Data are representative of three independent biological replicates. \* $p < 0.05$ , \*\* $p < 0.01$ .
